# Supplementary material for: CoP and Ni2P implanted in a hollow porous N-doped carbon polyhedron for pH universal hydrogen evolution reaction and alkaline overall water splitting
Source: Royal Society of Chemistry journal article supplement (doi:10.1039/d0nr07126a), 2020-01-01
Supplement: d0nr07126a1.pdf [file d0nr07126a1.pdf]

## Electronic Supplementary Information

CoP and Ni<sub>2</sub>P implanted in hollow porous N-doped carbon polyhedron for pH universal hydrogen evolution reaction and alkaline overall water splitting

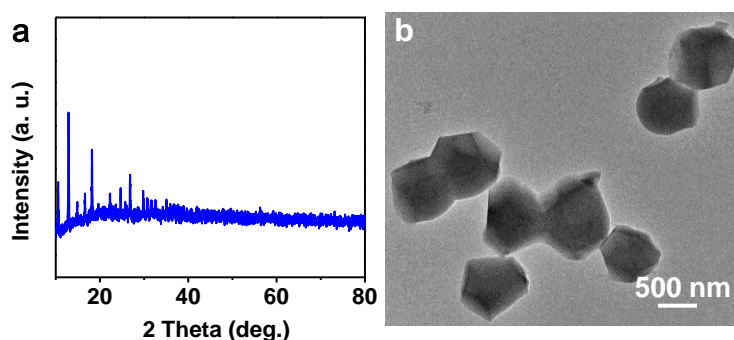

Fig. S1 (a) XRD and (b) TEM image of ZIF-67

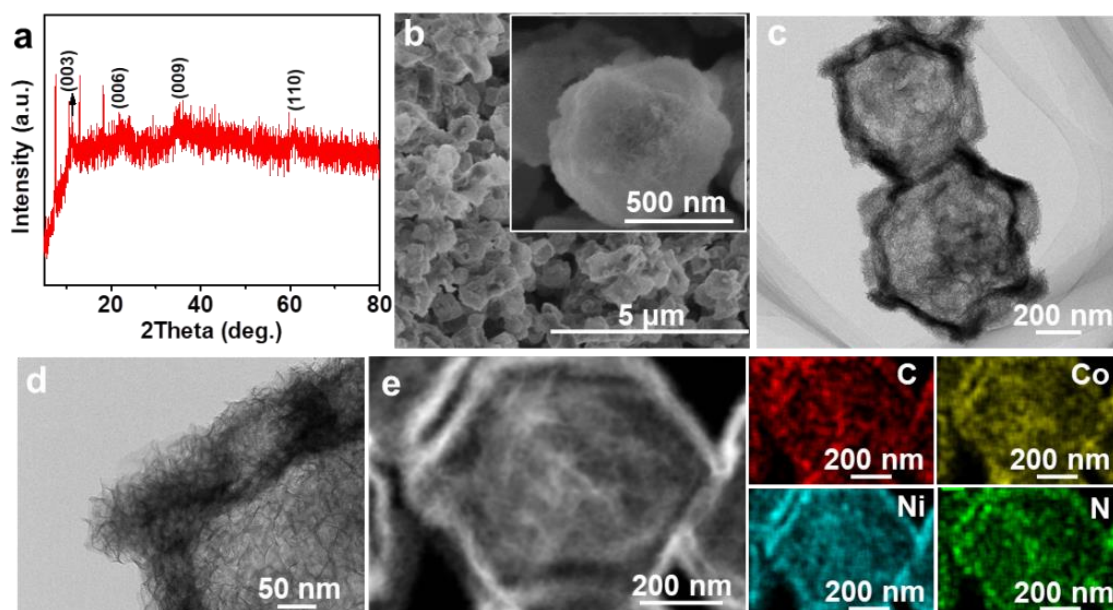

Fig. S2 (a) XRD patterns, (b) SEM image, (c) low magnification and (d) high magnification TEM image and (e) HAADF-STEM image and corresponding elemental mapping of Co/Ni-LDH@ZIF-67.

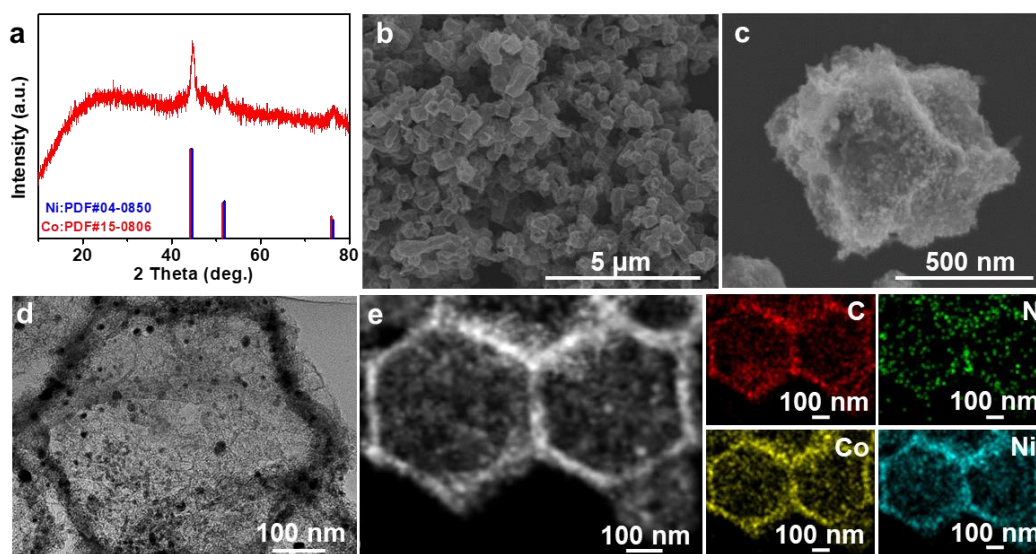

**Fig. S3** (a) XRD patterns, (b) low magnification and (c) high magnification SEM images, (d) TEM image, (e) HAADF-STEM image and corresponding EDS elemental mapping of the as-synthesized Co,Ni@HPNCP.

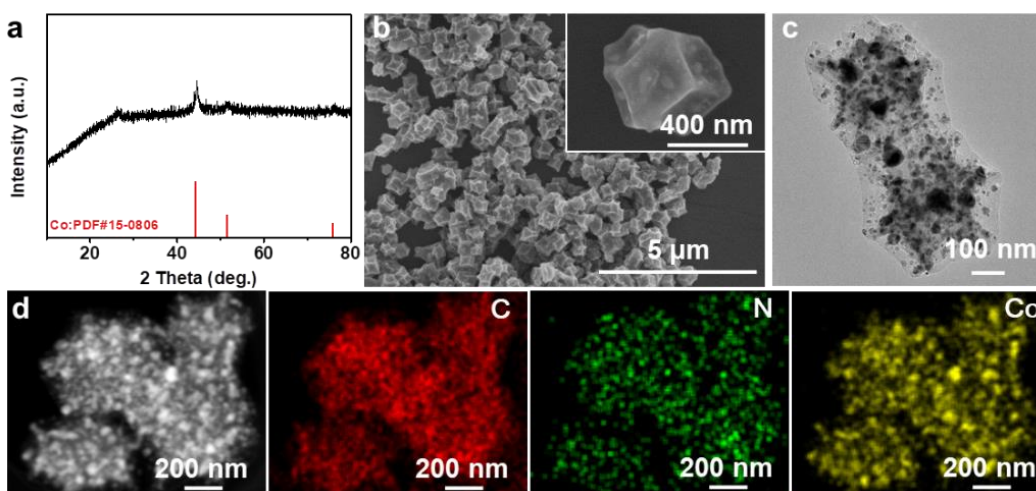

**Fig. S4** (a) XRD patterns, (b) SEM image, (c) TEM image, (d) HAADF-STEM image and corresponding EDS elemental mapping of the as-synthesized Co@NCP. Inset in (b) is magnified SEM image.

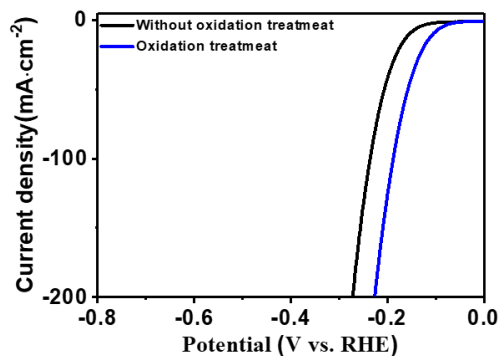

**Fig. S5** HER LSV curves of CoP/Ni<sub>2</sub>P@HPNCP fabricated by phosphorization of Co/Ni@HPNCP with and without oxidation treatment in air.

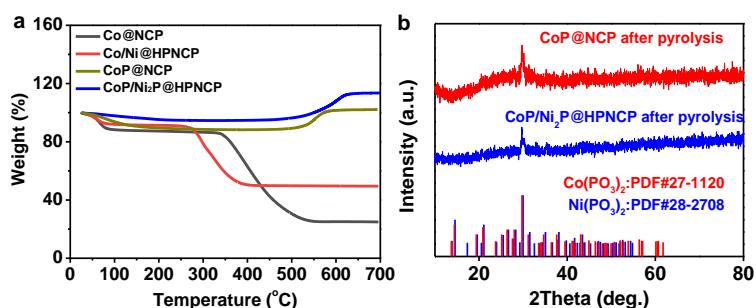

**Fig. S6** (a) TGA curves of CoP/Ni<sub>2</sub>P@HPNCP, CoP@NCP, Co/Ni@HPNCP and Co@NCP in air, (b) XRD patterns of the residue after pyrolysis of CoP/Ni<sub>2</sub>P@HPNCP and CoP@NCP.

The final residue (114.3 wt%) is Co(PO<sub>3</sub>)<sub>2</sub> and Ni(PO<sub>3</sub>)<sub>2</sub> based on TGA and XRD. Therefore, the relatively content of CoP and Ni<sub>2</sub>P in CoP/Ni<sub>2</sub>P@HPNCP can be calculated by following equation:

$$(X/M(\text{CoP})) \times M(\text{Co}(\text{PO}_3)_2) + (Y/M(\text{Ni}_2\text{P})) \times 2 \times M(\text{Ni}(\text{PO}_3)_2) = 1.143$$

where, M(CoP), M(Co(PO<sub>3</sub>)<sub>2</sub>), M(Ni<sub>2</sub>P) and M(Ni(PO<sub>3</sub>)<sub>2</sub>) is the molar mass of CoP, Co(PO<sub>3</sub>)<sub>2</sub>, Ni<sub>2</sub>P and (Ni(PO<sub>3</sub>)<sub>2</sub>). Because the ratio of Ni with Co is 1:5 based on ICP-MS measurement results,

$$(X/M(\text{CoP})) : (2Y/M(\text{Ni}_2\text{P})) = 5:1$$

Therefore, the value of X and Y is 0.3953 and 0.0653, respectively. Consequently, the relative content of phosphide is 46.06 %.

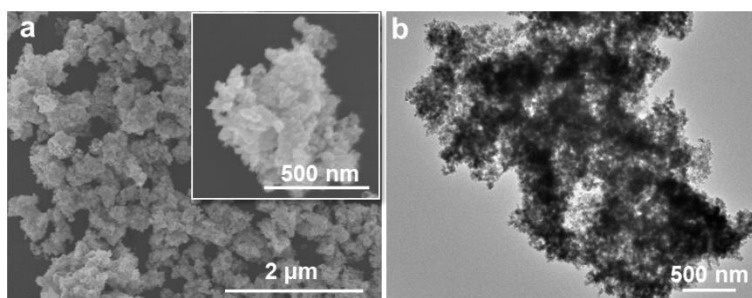

**Fig. S7** (a) SEM and (b) TEM image of CoP@NCP.

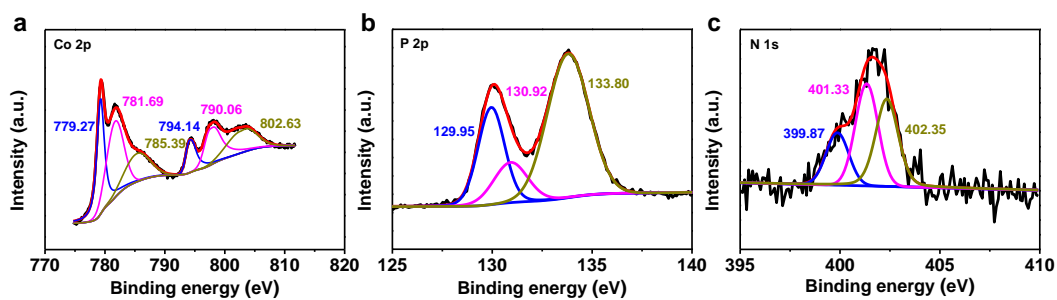

**Fig. S8** XPS high-resolution spectra of CoP@NCP: (a) Co 2p, (b) P 2p and (c) N 1s.

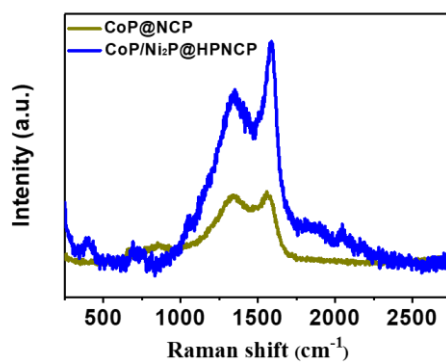

**Fig. S9** Raman spectra of CoP/Ni<sub>2</sub>P@HPNCP and CoP@NCP.

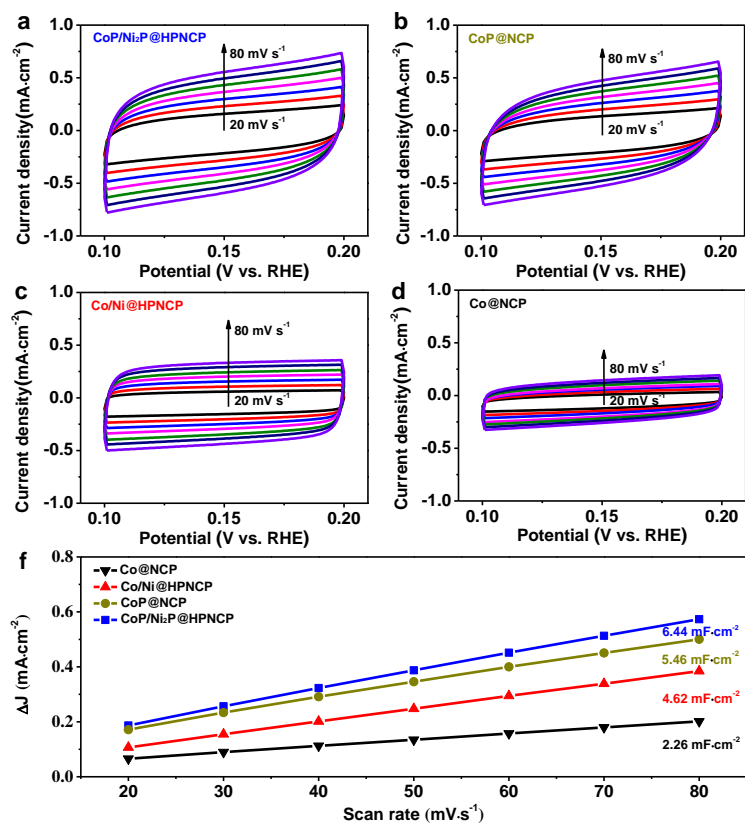

**Fig. S10** CV curves of (a)CoP/Ni<sub>2</sub>P@HPNCP, (b) CoP@NCP, (c) Co/Ni@HPNCP and (d) Co@NCP in the non-faradaic capacitance from 0.10 V to 0.20 V vs. RHE at scan rate of 20, 30, 40, 50, 60, 70 and 80 mV s<sup>-1</sup> in 1.0 M KOH, (f) calculated C<sub>dl</sub> for CoP/Ni<sub>2</sub>P@HPNCP, CoP@NCP, Co/Ni@HPNCP and Co@NCP.

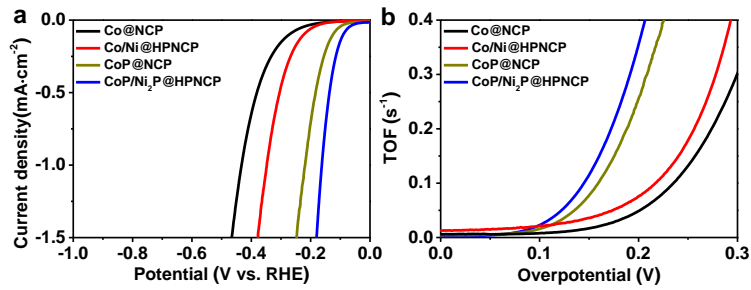

**Fig. S11** (a) Specific activity and (b) TOF of CoP/Ni<sub>2</sub>P@HPNCP, CoP@NCP, Co/Ni@HPNCP and Co@NCP in 1.0 KOH.

The specific activity was calculated by normalizing the  $C_{dl}$  to a standard specific capacitance ( $40 \mu\text{F cm}^{-2}$ ).<sup>1</sup> Turnover frequency (TOF) can be obtained from the equation:  $\text{TOF} = (J \times A) / (z \times F \times n)$ , Where  $J$  is the current density at specific overpotential ( $\text{mA cm}^{-2}$ ),  $A$  presents geometric area of the samples ( $\text{cm}^2$ ),  $F$  is faraday constant ( $96485 \text{ C mol}^{-1}$ ) and  $n$  represents the total moles number of all active metal sites,  $Z$  is the electron number transferred to product one molecule gas. For HER,  $N$  is 2, for OER,  $N$  is 4.<sup>2-3</sup>

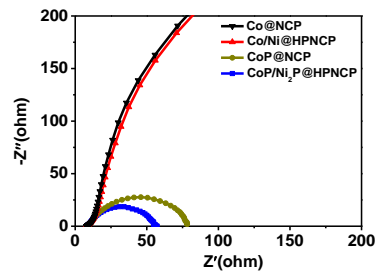

**Fig. S12** EIS of CoP/Ni<sub>2</sub>P@HPNCP, CoP@NCP, Co/Ni@HPNCP and Co@NCP measured in 1.0 KOH.

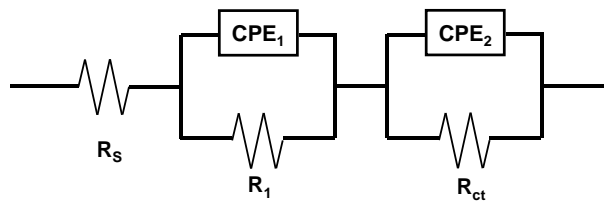

**Fig. S13** The equivalent circuit model of EIS analysis of all samples.

The equivalent circuit constitutes by a parallel combination of ( $R_{ct}$ ,  $CPE_1$ ) and ( $R_2$ ,  $CPE_2$ ) element in series with  $R_s$ . The CPE is regarded as the double layer capacitor from the catalyst/support and catalyst solution.  $R_s$ ,  $R_{ct}$  and  $R_1$  is uncompensated solution resistance, charge transfer resistance and the contact resistance between the catalyst material and the others resistance, respectively.

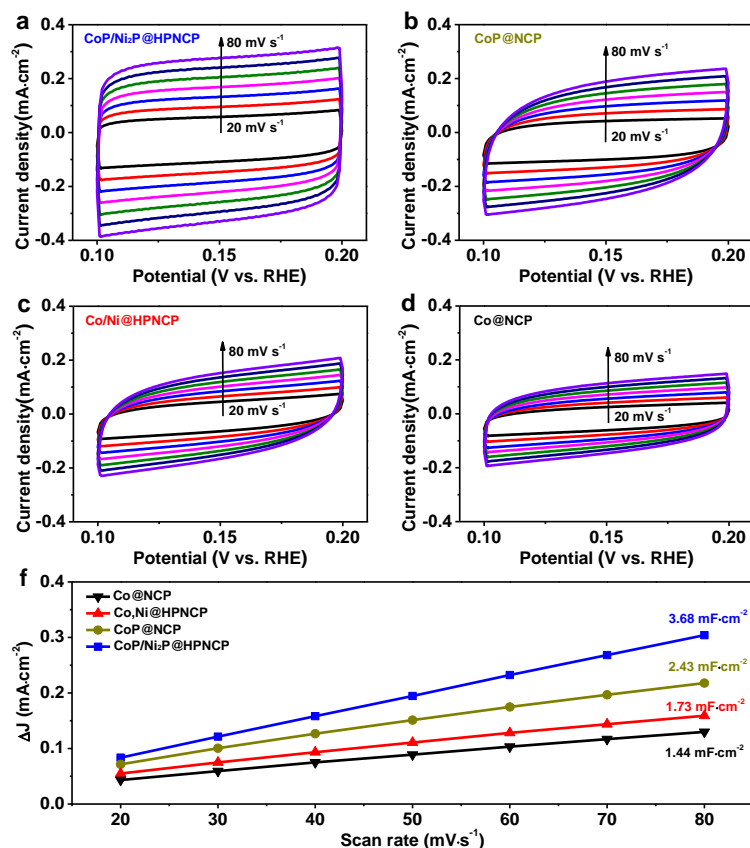

**Fig. S14** CV curves of (a)CoP/Ni<sub>2</sub>P@HPNCP, (b) CoP@NCP, (c) Co/Ni@HPNCP and (d) Co@NCP in the non-faradaic capacitance from 0.10 V to 0.20 V vs. RHE at scan rate of 20, 30, 40, 50, 60, 70 and 80 mV s<sup>-1</sup> in 0.5 M H<sub>2</sub>SO<sub>4</sub>, (f) calculated  $C_{dl}$  for CoP/Ni<sub>2</sub>P@HPNCP, CoP@NCP, Co/Ni@HPNCP and Co@NCP.

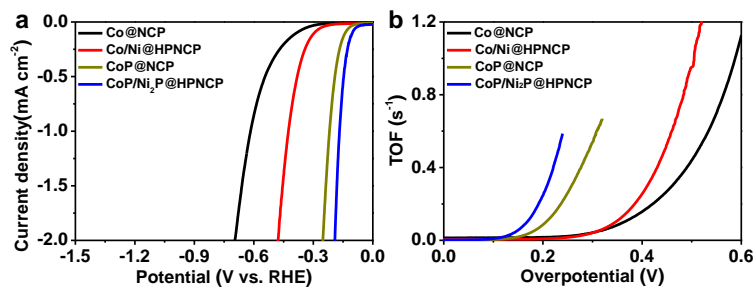

**Fig. S15** (a) Specific activity and (b) TOF of CoP/Ni<sub>2</sub>P@HPNCP, CoP@NCP, Co/Ni@HPNCP and Co@NCP in 0.5 H<sub>2</sub>SO<sub>4</sub>.

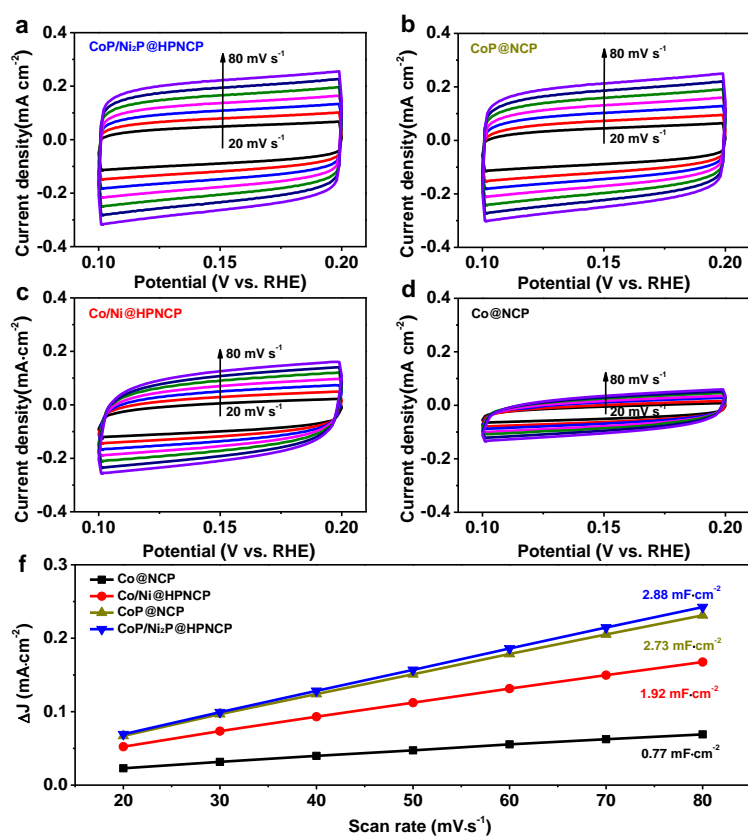

**Fig. S16** CV curves of (a)CoP/Ni<sub>2</sub>P@HPNCP, (b) CoP@NCP, (c) Co/Ni@HPNCP and (d) Co@NCP in the non-faradaic capacitance from 0.10 V to 0.20 V vs. RHE at scan rate of 20, 30, 40, 50, 60, 70 and 80 mV s<sup>-1</sup> in 1.0 M PBS, (f) calculated C<sub>dl</sub> for CoP/Ni<sub>2</sub>P@HPNCP, CoP@NCP, Co/Ni@HPNCP and Co@NCP.



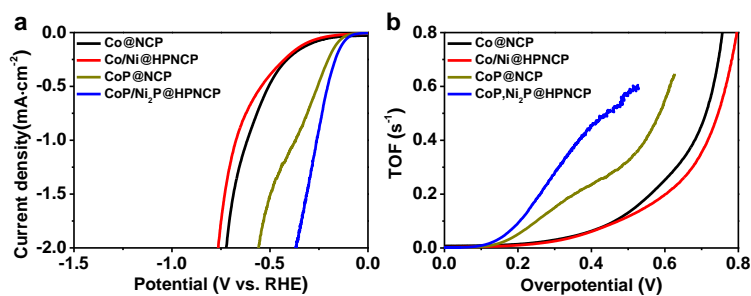

**Fig. S17** (a) Specific activity and (b) TOF of CoP/Ni<sub>2</sub>P@HPNCP, CoP@NCP, Co/Ni@HPNCP and Co@NCP in 1.0 M PBS.

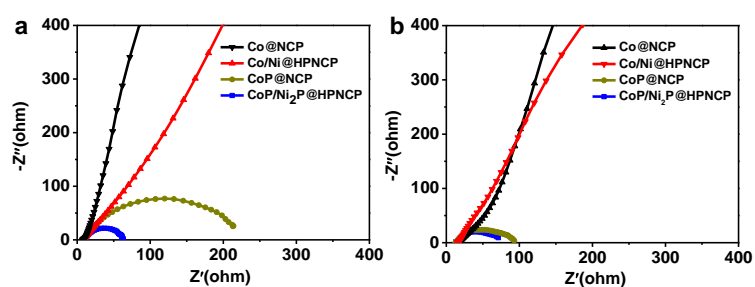

**Fig. S18** EIS of CoP/Ni<sub>2</sub>P@HPNCP, CoP@NCP, Co/Ni@HPNCP and Co@NCP measured in (a) 0.5 H<sub>2</sub>SO<sub>4</sub> and (b) 1.0 M PBS.

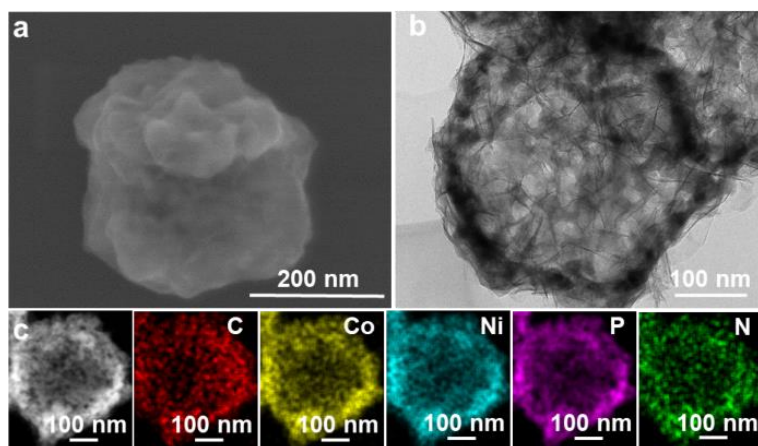

**Fig. S19** (a) SEM image, (b) TEM image, (c) HAADF-STEM image and corresponding EDS elemental mapping of CoP/Ni<sub>2</sub>P@HPNCP after long-term test in 1.0 M KOH.

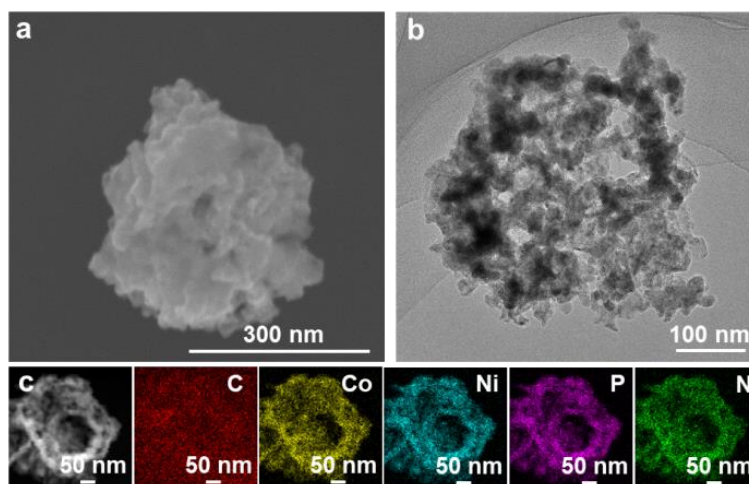

**Fig. S20** (a) SEM image, (b) TEM image, (c) HAADF-STEM image and corresponding EDS elemental mapping of CoP/Ni<sub>2</sub>P@HPNCP after long-term test in 0.5 M H<sub>2</sub>SO<sub>4</sub>.

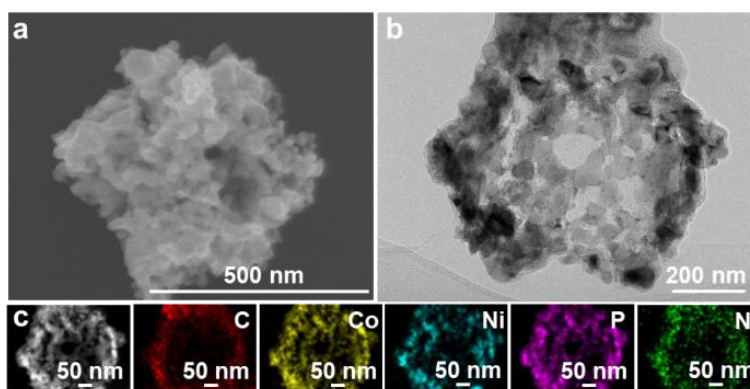

**Fig. S21** (a) SEM image, (b) TEM image, (c) HAADF-STEM and corresponding EDS elemental mapping of CoP/Ni<sub>2</sub>P@HPNCP after long-term test in 1.0 M PBS.

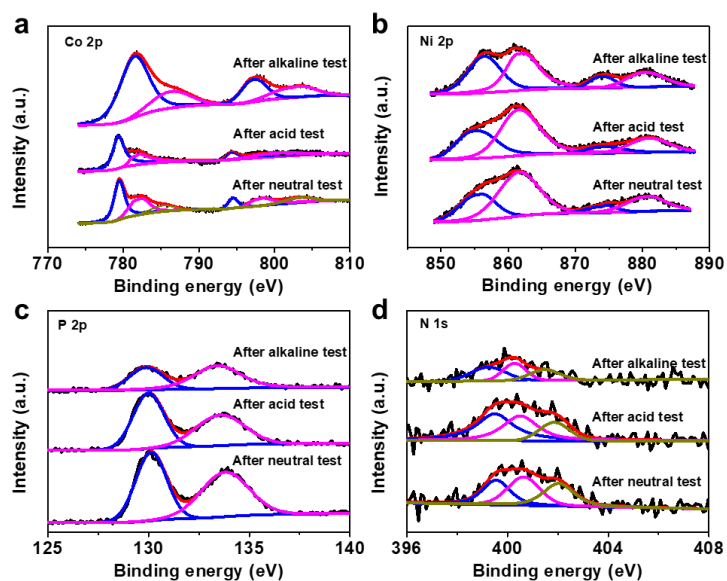

**Fig. S22** XPS high-resolution spectra of CoP/Ni<sub>2</sub>P@HPNCP after long-term HER test (a) Co 2p, (b) Ni 2P, (c) P 2p and (d) N 1s.

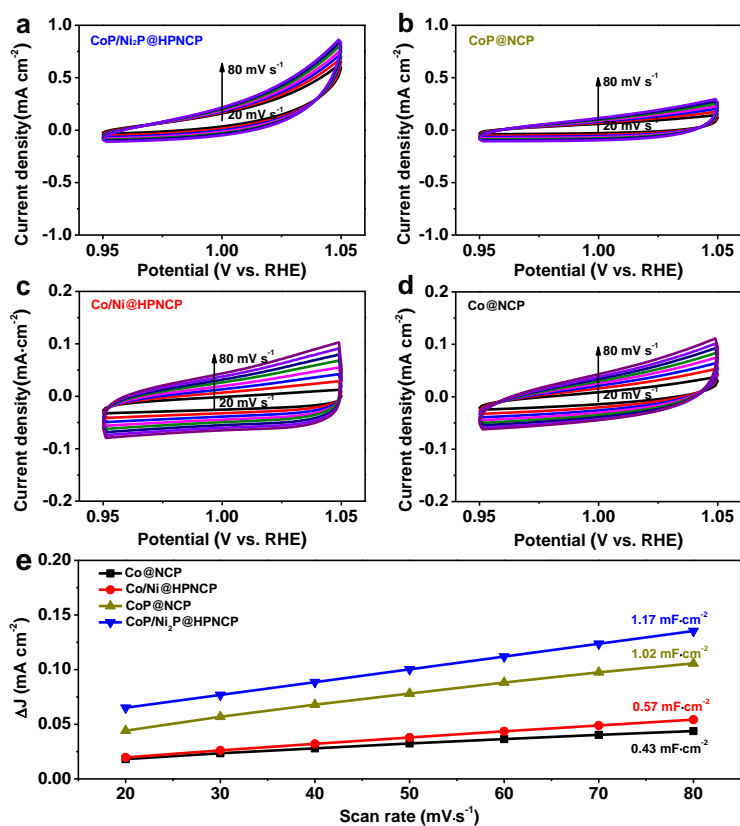

**Fig. S23** CV curves of (a)CoP/Ni<sub>2</sub>P@HPNCP, (b) CoP@NCP, (c) Co/Ni@HPNCP and (d) Co@NCP in the non-faradaic capacitance from 0.95 V to 1.05 V vs. RHE at scan rate of 20, 30, 40, 50, 60, 70 and 80 mV s<sup>-1</sup> in 1.0 M KOH, (f) calculated C<sub>dl</sub> for CoP/Ni<sub>2</sub>P@HPNCP, CoP@NCP, Co/Ni@HPNCP and Co@NCP.

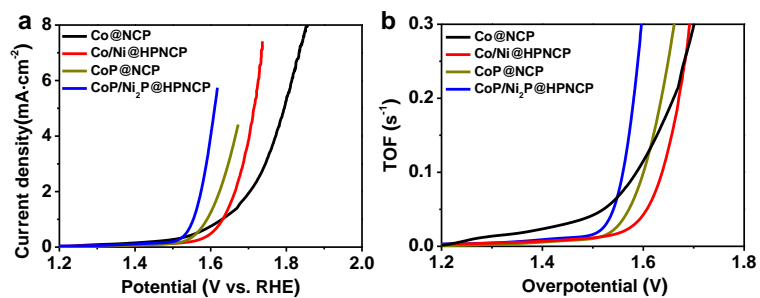

**Fig. S24** (a) Specific activity and (b) TOF of CoP/Ni<sub>2</sub>P@HPNCP, CoP@NCP, Co/Ni@HPNCP and Co@NCP in 1.0 M KOH.

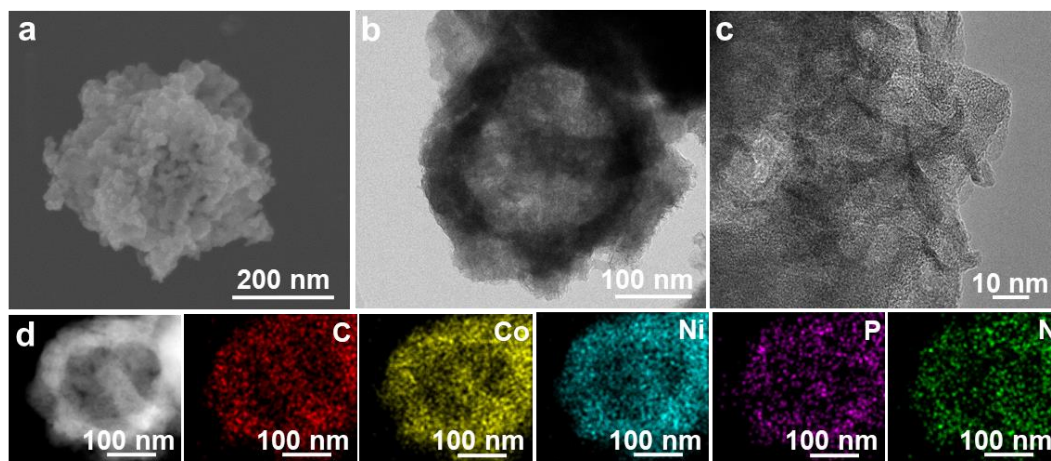

**Fig. S25** (a) SEM image, (b) TEM image, (c) HRTEM, (d) HAADF-STEM and corresponding EDS elemental mapping of CoP/Ni<sub>2</sub>P@HPNCP after OER test.

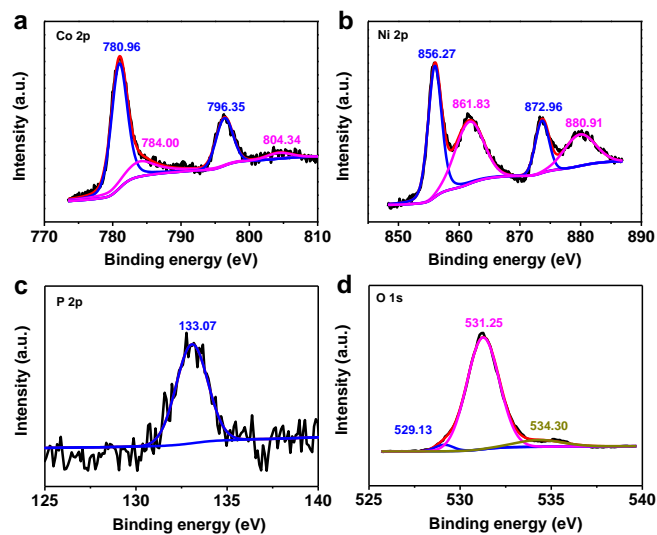

**Fig. S26** XPS high-resolution spectra of CoP/Ni<sub>2</sub>P@HPNCP after OER test: (a) Co 2p, (b) Ni 2p, (c) P 2p and (d) O 1s.

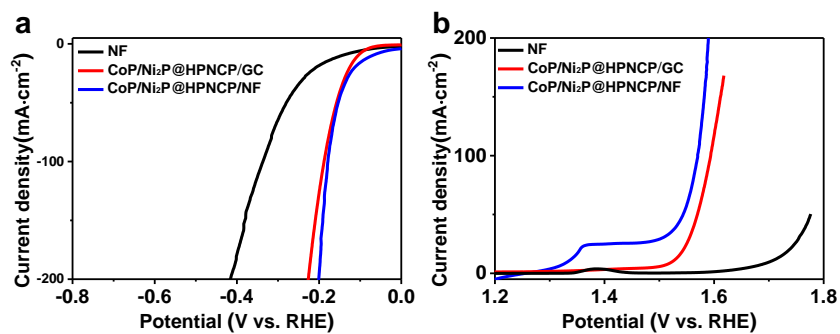

**Fig. S27** (a) HER and (b) OER LSV curves of CoP/Ni<sub>2</sub>P@HPNCP deposited on Ni foam and glass carbon electrode surface.

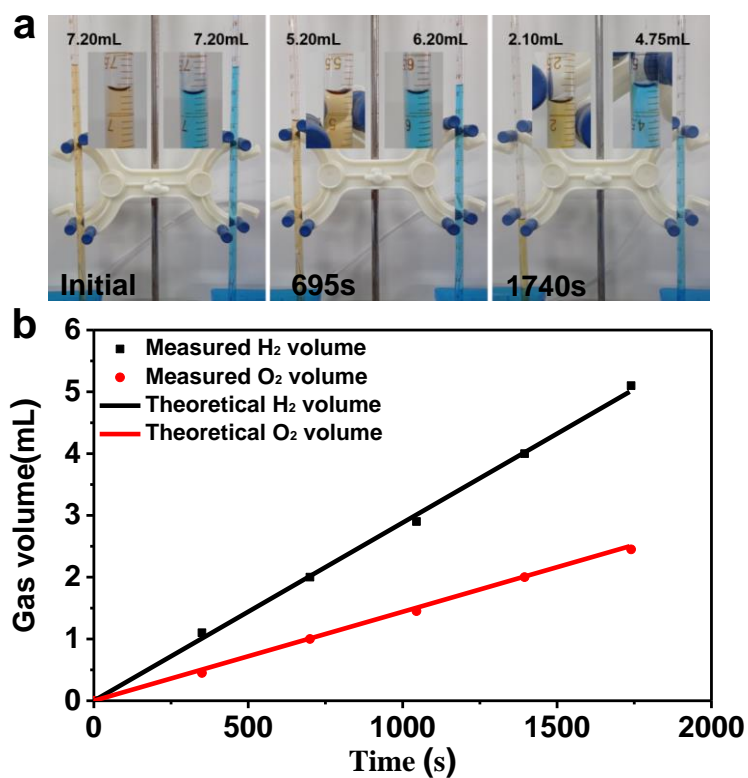

**Fig. S28** (a)The digital photo of H<sub>2</sub> and O<sub>2</sub> volume at different test time, (b) Volume of H<sub>2</sub> and O<sub>2</sub> as a function time at 0.025 A.

The theoretical volume of H<sub>2</sub> or O<sub>2</sub> during overall water splitting can be calculated by following equation

$$V = \frac{i \times t \times 22.4}{n \times F}$$

where, V is volume of H<sub>2</sub> or O<sub>2</sub> (L), n is the electron number transferred to product one molecule gas, F presents the faraday constant (96485 C mol<sup>-1</sup>). i is applied current (A), t represents test time (s). In our experiment, i is 0.025 A.

**Table S1** Comparison of HER, OER and overall water splitting of CoP/Ni<sub>2</sub>P@HPNCP with other reported phosphide-based bifunctional electrocatalysts in 1.0 M KOH.

| Catalysts                                  | Overpotential at 10 mA cm <sup>-2</sup> (mV) |             | Tafel slope (mV dec <sup>-1</sup> ) |      | Electrolytic cell voltage at 10 mA cm <sup>-2</sup> (V) | Reference |
|--------------------------------------------|----------------------------------------------|-------------|-------------------------------------|------|---------------------------------------------------------|-----------|
|                                            | HER                                          | OER         | HER                                 | OER  |                                                         |           |
| CoP/Ni <sub>2</sub> P@HPNCP                | 106                                          | 294         | 65.9                                | 65.5 | 1.59                                                    | This work |
| CoP/NCNHP                                  | 115                                          | 310         | 66                                  | 70   | 1.64                                                    | 4         |
| CoxP/N-doped C                             | 187                                          | 380         | 58.5                                | 68.1 | 1.71                                                    | 5         |
| CoP/EEBP                                   | 118                                          | 315         | 79                                  | 75   | 1.666                                                   | 6         |
| Co <sub>2</sub> P/CoNPC                    | 208                                          | 326         | 72.6                                | 83.9 | 1.64                                                    | 7         |
| Ni <sub>2</sub> P/NF                       | 116                                          | 290<br>(50) | 68                                  | 75   | 1.63                                                    | 8         |
| NiCoFeP/C                                  | 149                                          | 270         | 89                                  | 65   | 1.60                                                    | 9         |
| FeP <sub>2</sub> -NiP <sub>2</sub> @PC     | 179                                          | 248         | 65                                  | 54   | 1.70                                                    | 10        |
| NiCoP@Cu <sub>3</sub> P                    | 54                                           | 309         | 72                                  | 42   | -                                                       | 11        |
| FeNi-LDH/CoP/CC                            | 138.6<br>(20)                                | 231<br>(20) | 56.1                                | 33.5 | 1.617                                                   | 12        |
| FeCo/Co <sub>2</sub> P@NPCF                | 260                                          | 330         | 120                                 | 61   | -                                                       | 13        |
| CoP/Ni <sub>2</sub> P                      | 200                                          | 300         | 103                                 | 60   | 1.60                                                    | 14        |
| Fe <sub>0.29</sub> Co <sub>0.71</sub> P/NF | 74                                           | 251<br>(50) | 53.6                                | 37.8 | 1.59                                                    | 15        |

**Table S2** EIS fitting parameters from equivalent circuits of all samples during HER process in 1.0 M KOH.

| Samples                     | $R_s$<br>/ $\Omega$ | $CPE_1$<br>/ $S s^{-n}$ | $n_1/$<br>$0 < n < 1$ | $R_1$<br>/ $\Omega$ | $CPE_2$<br>/ $S s^{-n}$ | $n_2/$<br>$0 < n < 1$ | $R_{ct}$<br>/ $\Omega$ |
|-----------------------------|---------------------|-------------------------|-----------------------|---------------------|-------------------------|-----------------------|------------------------|
| CoP/Ni <sub>2</sub> P@HPNCP | 8.196               | 3.759<br>E-002          | 0.80                  | 1.886               | 3.416<br>E-004          | 0.87                  | 45.54                  |
| CoP@NCP                     | 8.226               | 1.801<br>E-002          | 0.38                  | 0.598               | 7.563<br>E-004          | 0.88                  | 64.81                  |
| Co/Ni@HPNCP                 | 7.739               | 9.394<br>E-004          | 0.39                  | 0.465               | 1.465<br>E-002          | 0.44                  | 710.5                  |
| Co@NCP                      | 8.230               | 1.003<br>E-003          | 0.82                  | 0.592               | 2.670<br>E-003          | 0.65                  | 849.0                  |

**Table S3** Comparison of HER of CoP/Ni<sub>2</sub>P@HPNCP with other reported phosphide-based bifunctional electrocatalysts in 0.5 M H<sub>2</sub>SO<sub>4</sub>.

| Catalysts                             | Overpotential at<br>10 mA cm <sup>-2</sup> (mV) | Tafel slope<br>(mV dec <sup>-1</sup> ) | Reference |
|---------------------------------------|-------------------------------------------------|----------------------------------------|-----------|
| CoP/Ni <sub>2</sub> P@HPNCP           | 130                                             | 63.38                                  | This work |
| CoP/NCNHP                             | 140                                             | 53                                     | 4         |
| CoP-InNC@CNT                          | 153                                             | 62                                     | 16        |
| Ni-Cu-P films                         | 150                                             | 69                                     | 17        |
| Co <sub>4</sub> Ni <sub>1</sub> P NTs | 131                                             | 54                                     | 18        |
| Ni-CoP/HPFs                           | 144                                             | 52                                     | 19        |
| CoP/Ni <sub>2</sub> P                 | 174                                             | 78                                     | 14        |
| CoP NPs                               | 135                                             | 65                                     | 20        |



**Table S4** Comparison of HER of CoP/Ni<sub>2</sub>P@HPNCP with other reported phosphide-based bifunctional electrocatalysts in 1.0 M PBS.

| Catalysts                                   | Overpotential at 10 mA cm <sup>-2</sup> (mV) | Tafel slope (mV dec <sup>-1</sup> ) | Reference |
|---------------------------------------------|----------------------------------------------|-------------------------------------|-----------|
| CoP/Ni <sub>2</sub> P@HPNCP                 | 141                                          | 87.2                                | This work |
| CoP-400                                     | 161                                          | 81                                  | 21        |
| V, N-CoP                                    | 146                                          | 88                                  | 22        |
| Ni <sub>2</sub> P@NPCNFs/CC                 | 185.3                                        | 230.3                               | 23        |
| NiCoP/rGO                                   | 142                                          | 91                                  | 24        |
| Ni-Co-P-H (0.5M PBS)                        | 157                                          | 84                                  | 25        |
| Co <sub>0.6</sub> Fe <sub>0.4</sub> P-1.125 | 140                                          | 75                                  | 26        |

**Table S5** EIS fitting parameters from equivalent circuits of all samples during HER process in 0.5 M H<sub>2</sub>SO<sub>4</sub>.

| Samples                     | R <sub>s</sub> /Ω | CPE <sub>1</sub> / S s <sup>-n</sup> | n <sub>1</sub> / 0<n<1 | R <sub>1</sub> / Ω | CPE <sub>2</sub> / S s <sup>-n</sup> | n <sub>2</sub> / 0<n<1 | R <sub>ct</sub> /Ω |
|-----------------------------|-------------------|--------------------------------------|------------------------|--------------------|--------------------------------------|------------------------|--------------------|
| CoP/Ni <sub>2</sub> P@HPNCP | 8.399             | 4.473<br>E-004                       | 0.89                   | 0.339              | 2.326<br>E-003                       | 0.57                   | 51.0               |
| CoP@NCP                     | 8.745             | 9.112<br>E-005                       | 0.80                   | 0.337              | 7.359<br>E-004                       | 0.60                   | 213.5              |
| Co/Ni@HPNCP                 | 7.816             | 2.645<br>E-004                       | 0.82                   | 8.28               | 8.634<br>E-004                       | 0.59                   | 9.464<br>E+003     |
| Co@NCP                      | 8.062             | 4.635<br>E-004                       | 0.90                   | 5.45               | 1.180<br>E-003                       | 0.69                   | 1.478<br>E+004     |

**Table S6** EIS fitting parameters from equivalent circuits of all samples during HER process in 1.0 M PBS.

| Samples                     | $R_s$<br>/ $\Omega$ | $CPE_1$<br>/ $S s^{-n}$ | $n_1/$<br>$0 < n < 1$ | $R_1$<br>/ $\Omega$ | $CPE_2$<br>/ $S s^{-n}$ | $n_2/$<br>$0 < n < 1$ | $R_{ct}$<br>/ $\Omega$ |
|-----------------------------|---------------------|-------------------------|-----------------------|---------------------|-------------------------|-----------------------|------------------------|
| CoP/Ni <sub>2</sub> P@HPNCP | 13.08               | 3.952<br>E-005          | 0.54                  | 23.02               | 3.420<br>E-003          | 0.54                  | 49.52                  |
| CoP@NCP                     | 12.99               | 3.670<br>E-003          | 0.59                  | 24.56               | 7.666<br>E-004          | 0.46                  | 60.99                  |
| Co/Ni@HPNCP                 | 15.25               | 3.566<br>E-003          | 0.87                  | 53.59               | 1.174<br>E-003          | 0.55                  | 3.876<br>E+003         |
| Co@NCP                      | 14.94               | 6.024<br>E-004          | 0.86                  | 69.12               | 5.093<br>E-003          | 0.52                  | 8.879<br>E+003         |

**Table S7** EIS fitting parameters from equivalent circuits of all samples during OER process in 1.0 M KOH.

| Samples                     | $R_s$<br>/ $\Omega$ | $Q_1$<br>/ $S s^{-n}$ | $n_1/$<br>$0 < n < 1$ | $R_1$<br>/ $\Omega$ | $Q_2$<br>/ $S s^{-n}$ | $n_2/$<br>$0 < n < 1$ | $R_{ct}$<br>/ $\Omega$ |
|-----------------------------|---------------------|-----------------------|-----------------------|---------------------|-----------------------|-----------------------|------------------------|
| CoP/Ni <sub>2</sub> P@HPNCP | 8.532               | 1.425<br>E-002        | 0.79                  | 18.47               | 8.164<br>E-004        | 0.54                  | 76.07                  |
| CoP@NCP                     | 9.785               | 9.159<br>E-004        | 0.56                  | 13.05               | 9.174<br>E-003        | 0.79                  | 107.5                  |
| Co/Ni@HPNCP                 | 9.453               | 4.317<br>E-003        | 0.46                  | 31.5                | 2.328<br>E-003        | 0.82                  | 593.0                  |
| Co@NCP                      | 9.464               | 9.938<br>E-005        | 0.77                  | 83.31               | 9.728<br>E-003        | 0.59                  | 918.1                  |

## References

1. L. Zhang, X. Ren, X. Guo, Z. Liu, A. M. Asiri, B. Li, L. Chen and X. Sun, *Inorg. Chem.*, 2018, **57**, 548-552.
2. G. Li, J. Yu, W. Yu, L. Yang, X. Zhang, X. Liu, H. Liu and W. Zhou, *Small*, 2020, **16**, e2001980.
3. G. Zhao, K. Rui, S. X. Dou and W. Sun, *Adv. Funct. Mater.*, 2018, **28**, 1803291.
4. Y. Pan, K. A. Sun, S. J. Liu, X. Cao, K. L. Wu, W. C. Cheong, Z. Chen, Y. Wang,

- Y. Li, Y. Q. Liu, D. S. Wang, Q. Peng, C. Chen and Y. D. Li, *J. Am. Chem. Soc.*, 2018, **140**, 2610-2618.
5. J. S. Li, L. X. Kong, Z. X. Wu, S. Zhang, X. Y. Yang, J. Q. Sha and G. D. Liu, *Carbon*, 2019, **145**, 694-700.
  6. T. T. Liang, Y. D. Liu, P. F. Zhang, C. T. Liu, F. Ma, Q. Y. Yan and Z. F. Dai, *Chem. Eng. J.*, 2020, **395**, 10.
  7. H. Liu, J. Guan, S. Yang, Y. Yu, R. Shao, Z. Zhang, M. Dou, F. Wang and Q. Xu, *Adv. Mater.*, 2020, **32**, 2003649.
  8. Y. T. Wu, H. Wang, S. Ji, B. G. Pollet, X. Y. Wang and R. F. Wang, *Nano Research*, 2020, **13**, 2098-2105.
  9. X. J. Wei, Y. H. Zhang, H. C. He, L. Peng, S. H. Xiao, S. R. Yao and P. Xiao, *Chem. Commun.*, 2019, **55**, 10896-10899.
  10. P. X. Ji, H. H. Jin, H. L. Xia, X. Luo, J. K. Zhu, Z. H. Pu and S. C. Mu, *ACS Appl. Mater. Interfaces*, 2020, **12**, 727-733.
  11. X. X. Ma, Y. Q. Chang, Z. Zhang and J. L. Tang, *J. Mater. Chem. A*, 2018, **6**, 2100-2106.
  12. K. He, T. T. Tsega, X. Liu, J. Zai, X.-H. Li, X. Liu, W. Li, N. Ali and X. Qian, *Angew. Chem. Int. Ed.*, 2019, **58**, 11903-11909.
  13. Q. Shi, Q. Liu, Y. Ma, Z. Fang, Z. Liang, G. Shao, B. Tang, W. Y. Yang, L. Qin and X. S. Fang, *Adv. Energy Mater.*, 2020, **10**, 11.
  14. J. Zhang, S. Wei, Y. Liu, G. Wang, Y. Cui, A. Dong, S. Xu, J. Lian and Q. Jiang, *J. Mater. Chem. A*, 2019, **7**, 26177-26186.
  15. H. P. Feng, L. Tang, G. M. Zeng, J. F. Yu, Y. C. Deng, Y. Y. Zhou, J. J. Wang, C. Y. Feng, T. Luo and B. B. Shao, *Nano Energy*, 2020, **67**, 11.
  16. L. L. Chai, Z. Y. Hu, X. Wang, Y. W. Xu, L. J. Zhang, T. T. Li, Y. Hu, J. J. Qian and S. M. Huang, *Adv. Sci.*, 2020, **7**, 10.
  17. M. Cao, Z. Xue, J. Niu, J. Qin, M. Sawangphruk, X. Zhang and R. Liu, *ACS Appl. Mater. Interfaces*, 2018, **10**, 35224-35233.
  18. L. Yan, L. Cao, P. Dai, X. Gu, D. Liu, L. Li, Y. Wang and X. Zhao, *Adv. Funct. Mater.*, 2017, **27**, 1703455.

19. Y. Pan, K. A. Sun, Y. Lin, X. Cao, Y. S. Cheng, S. J. Liu, L. Y. Zeng, W. C. Cheong, D. Zhao, K. L. Wu, Z. Liu, Y. Q. Liu, D. S. Wang, Q. Peng, C. Chen and Y. D. Li, *Nano Energy*, 2019, **56**, 411-419.
20. Y. Liu, Y. Zhu, J. Shen, J. Huang, X. Yang and C. Li, *Nanoscale*, 2018, **10**, 2603-2612.
21. H. Li, X. Zhao, H. Liu, S. Chen, X. Yang, C. Lv, H. Zhang, X. She and D. Yang, *Small*, 2018, **14**.
22. W. Zhang, Y. Sun, Q. Liu, J. Guo and X. Zhang, *J. Alloys Comp.*, 2019, **791**, 1070-1078.
23. M.-Q. Wang, C. Ye, H. Liu, M. Xu and S.-J. Bao, *Angew. Chem. Int. Ed.*, 2018, **57**, 1963-1967.
24. J. Li, M. Yan, X. Zhou, Z.-Q. Huang, Z. Xia, C.-R. Chang, Y. Ma and Y. Qu, *Adv. Funct. Mater.*, 2016, **26**, 6785-6796.
25. X. Liu, S. Deng, D. Xiao, M. Gong, J. Liang, T. Zhao, T. Shen and D. Wang, *ACS Appl. Mater. Interfaces*, 2019, **11**, 42233-42242.
26. Y. B. Lian, H. Sun, X. B. Wang, P. W. Qi, Q. Q. Mu, Y. J. Chen, J. Ye, X. H. Zhao, Z. Deng and Y. Peng, *Chem. Sci.*, 2019, **10**, 464-474.
